# Supplementary material for: Strippable Polymeric Nanocomposites Comprising “Green” Chelates, for the Removal of Heavy Metals and Radionuclides
Source: MDPI journal article supplement (doi:10.3390/polym13234194), 2021-11-30
Supplement: s1 [file s1]

## Supplementary Materials

For article

# Strippable polymer nanocomposite comprising “green” chelates, for the removal of heavy metals and radionuclides

Gabriela Toader<sup>1,‡</sup>, Daniela Pulpea<sup>1,‡</sup>, Traian Rotariu<sup>1,\*</sup>, Aurel Diacon<sup>2</sup>, Edina Rusen<sup>2,\*</sup>, Andreea Moldovan<sup>1</sup>, Alice Podaru<sup>1</sup>, Raluca Ginghină<sup>3</sup>, Florentina Alexe<sup>3</sup>, Ovidiu Iorga<sup>3</sup>, Sorina Aurora Bajenaru<sup>3</sup>, Mihai Ungureanu<sup>1</sup>, Florin Dirloman<sup>1</sup>, Bogdan Pulpea<sup>1</sup> and Lucia Leonat<sup>4</sup>

<sup>1</sup>Military Technical Academy “Ferdinand I”, 39-49 George Coșbuc Boulevard, Bucharest, 050141, Romania

<sup>2</sup>Faculty of Applied Chemistry and Materials Science, University ‘Politehnica’ of Bucharest, 1-7 Gh. Polizu Street, Bucharest, 011061, Romania

<sup>3</sup>Research and Innovation Center for CBRN Defense and Ecology, 225 Soseaua Oltenitei, Bucharest, 041327, Romania

<sup>4</sup>National Institute of Materials Physics, 077125, Măgurele, Romania

‡ Contributed equally to this study (co-first authors)

\*Corresponding authors: [traian.rotariu@gmail.com](mailto:traian.rotariu@gmail.com) and [edina.rusen@upb.ro](mailto:edina.rusen@upb.ro)

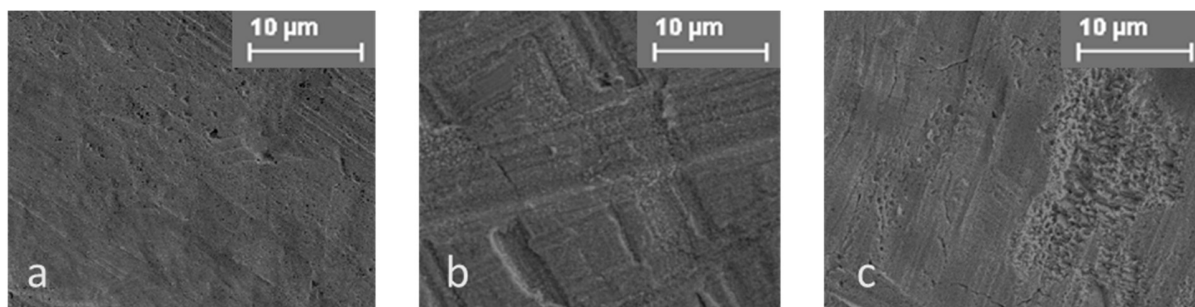

**Figure S.1** – Different types of “polishing” for the stainless-steel coupons employed for decontamination tests prior to contamination step: (a) mirror – finish (SSMF); (b) grinded-finish (SSGF); (c) etched-finish (SSEF)

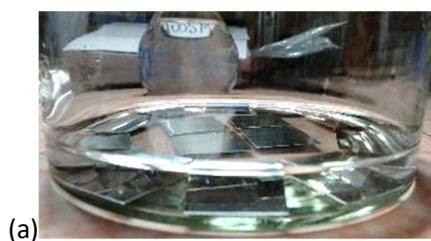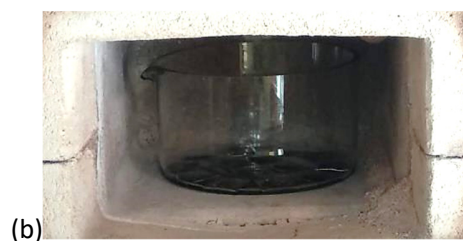

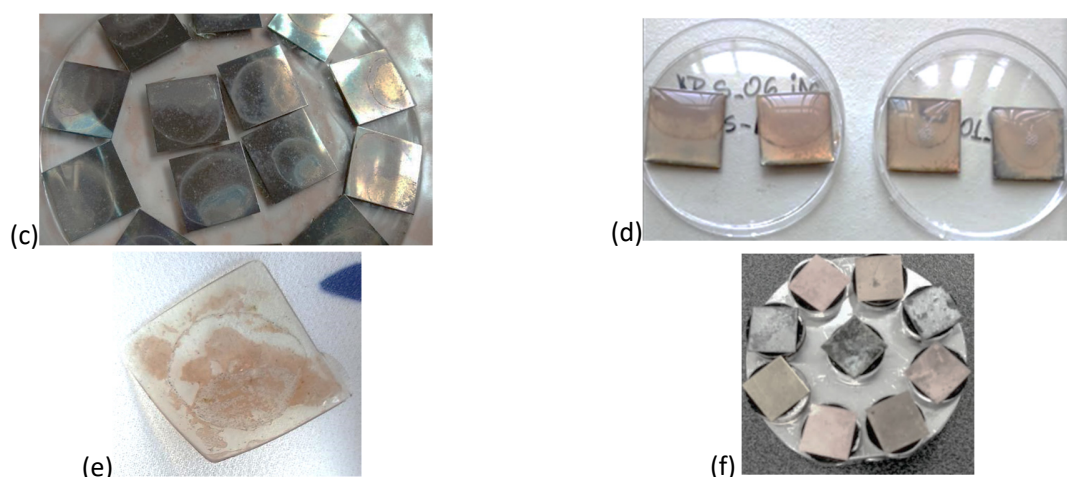

**Figure S.2** – Contamination (a) immersion in  $\text{Cs}_2\text{SO}_4$  aqueous solution ( $C_1 = 0.005\text{M}$ ); (b) “in-depth” contamination at  $700^\circ\text{C}$ ; (c) metallic coupons after in-depth decontamination; and Decontamination processes (d) applying one of the decontamination solutions; (e) peeled film; (f) different types of metallic samples prepared for SEM-EDS analysis after decontamination.

**Table S.1** - AAS instrumental parameters

| Element            | Pb                     | Co              | Sr               |
|--------------------|------------------------|-----------------|------------------|
| Wavelength(nm)     | 283.3                  | 242.5           | 460.7            |
| Lamp               | Hollow catode          |                 |                  |
| Slit Width         | 0.7L                   | 0.2L            | 0.7L             |
| READ TIME          | 5 sec                  |                 |                  |
| Graphite tube      | Pyrolytic graphite     |                 |                  |
| Calibration        |                        |                 |                  |
| Standards          | Conc. (μg/L)           | Conc. (μg/L)    | Conc. (μg/L)     |
| Std.1              | 5                      | 5               | 3                |
| Std.2              | 10                     | 10              | 6                |
| Std.3              | 15                     | 15              | 9                |
| Std.4              | 20                     | 20              | 12               |
| Std.5              | 25                     | 25              | 15               |
| Calibration Method | zero intercept. linear |                 |                  |
| Technique          | AA-BG                  | AA-BG           | AA               |
| Signal processing  | Peak Area              |                 |                  |
| Sample volume      | 20 μL                  |                 |                  |
| Replicate          | 3                      |                 |                  |
| Modifier /volume   | Pd/Mg(NO3)2/ 5 μL      | Mg(NO3)2 / 5 μL | Pd/Mg(NO3)2 5 μL |

### Furnace program for Pb, Co, Sr

| Step | Temp (°C) | Ramp time (s) | Hold time (s) | Internal flow (ml/min) | Gas type |
|------|-----------|---------------|---------------|------------------------|----------|
| 1    | 110       | 1             | 30            | 250                    | Argon    |
| 2    | 130       | 15            | 30            | 250                    | Argon    |
| 3    | 850       | 10            | 20            | 250                    | Argon    |
| 4    | 1800      | 0             | 5             | 0                      | Argon    |
| 5    | 2450      | 1             | 3             | 250                    | Argon    |

Injection temperature - 20 (°C). Read step - 4

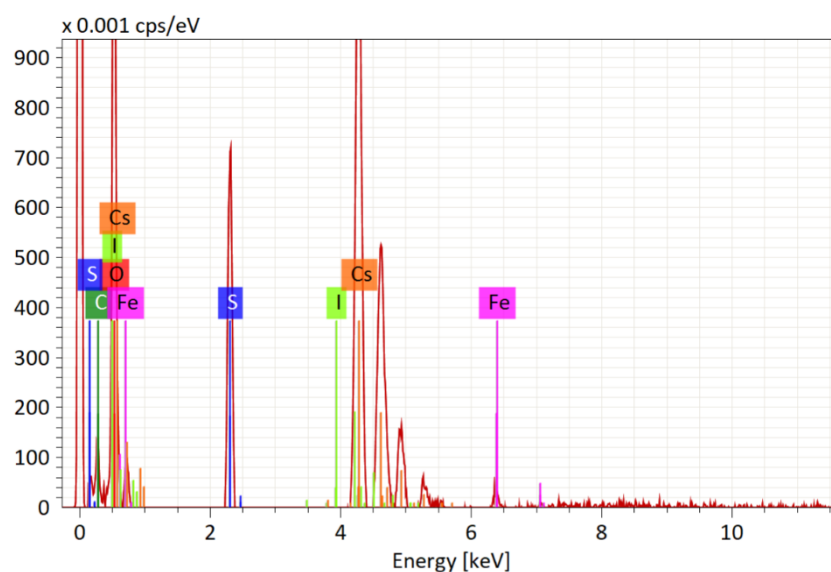

**Figure S.3** – EDS spectrum for SSMF contaminated with Cs

**Table S.2** – Values obtained from EDS analysis for SSMF contaminated with Cs

| Element | At. No. | Netto      | Mass [%]     | Mass Norm. [%] | Atom [%]      | abs. error [%]<br>(3 sigma) | rel. error [%]<br>(3 sigma) |
|---------|---------|------------|--------------|----------------|---------------|-----------------------------|-----------------------------|
| C       | 6       | 717        | 2.14         | 4.60           | 13.27         | 1.20                        | 55.92                       |
| O       | 8       | 8652       | 13.88        | 29.87          | 64.63         | 5.14                        | 36.99                       |
| S       | 16      | 6116       | 2.53         | 5.45           | 5.88          | 0.34                        | 13.53                       |
| Fe      | 26      | 318        | 0.74         | 1.59           | 0.99          | 0.14                        | 18.87                       |
| Cs      | 55      | 23149      | 27.18        | 58.48          | 15.23         | 2.42                        | 8.90                        |
|         |         | <b>Sum</b> | <b>46.47</b> | <b>100.00</b>  | <b>100.00</b> |                             |                             |

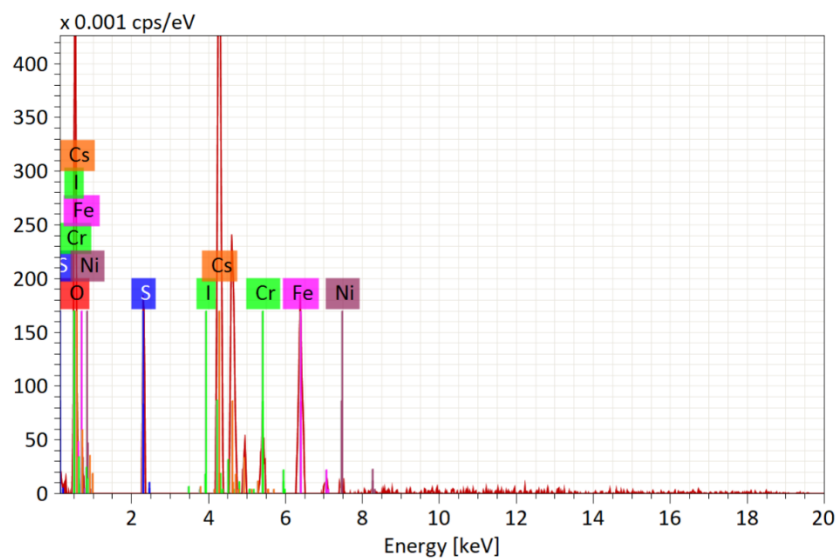

**Figure S.4** – EDS spectrum for SSGF contaminated with Cs

**Table S.3** – Values obtained from EDS analysis for SSGF contaminated with Cs

| Element | At. No. | Netto      | Mass [%]     | Mass Norm. [%] | Atom [%]      | abs. error [%]<br>(3 sigma) | rel. error [%]<br>(3 sigma) |
|---------|---------|------------|--------------|----------------|---------------|-----------------------------|-----------------------------|
| O       | 8       | 2867       | 8.05         | 35.45          | 74.05         | 3.39                        | 42.14                       |
| S       | 16      | 1281       | 0.59         | 2.62           | 2.73          | 0.14                        | 23.33                       |
| Cr      | 24      | 681        | 0.71         | 3.15           | 2.02          | 0.13                        | 18.53                       |
| Fe      | 26      | 2223       | 4.03         | 17.72          | 10.60         | 0.39                        | 9.79                        |
| Ni      | 28      | 58         | 0.19         | 0.85           | 0.48          | 0.09                        | 46.98                       |
| Cs      | 55      | 9430       | 9.14         | 40.22          | 10.12         | 0.83                        | 9.09                        |
|         |         | <b>Sum</b> | <b>22.72</b> | <b>100.00</b>  | <b>100.00</b> |                             |                             |

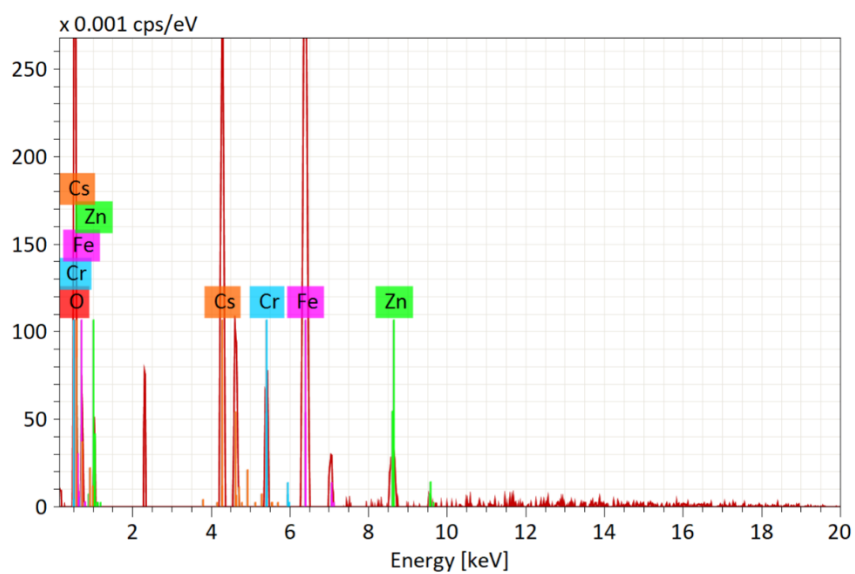

**Figure S.5** – EDS spectrum for SSEF contaminated with Cs

**Table S.4** – Values obtained from EDS analysis for SSEF contaminated with Cs

| Element | At. No. | Netto      | Mass [%]     | Mass Norm. [%] | Atom [%]      | abs. error [%]<br>(3 sigma) | rel. error [%]<br>(3 sigma) |
|---------|---------|------------|--------------|----------------|---------------|-----------------------------|-----------------------------|
| O       | 8       | 2968       | 6.09         | 35.24          | 69.54         | 2.57                        | 42.24                       |
| Cr      | 24      | 737        | 0.48         | 2.79           | 1.70          | 0.11                        | 23.57                       |
| Fe      | 26      | 4764       | 5.64         | 32.65          | 18.46         | 0.52                        | 9.26                        |
| Zn      | 30      | 490        | 2.35         | 13.58          | 6.56          | 0.26                        | 11.27                       |
| Cs      | 55      | 4069       | 2.72         | 15.74          | 3.74          | 0.30                        | 11.02                       |
|         |         | <b>Sum</b> | <b>17.28</b> | <b>100.00</b>  | <b>100.00</b> |                             |                             |
